# Supplementary material for: Turnover of Glycerolipid Metabolite Pool and Seed Viability
Source: PubMed Central journal article supplement (PMC5983817; doi:10.3390/ijms19051417), 2018-05-09
Supplement: ijms-19-01417-s001.pdf [file ijms-19-01417-s001.pdf]

Supporting Information

Table S1. Glycerolipids analyzed in this study.

| Glycerolipids                | Abbreviation | Structure                                                                             |
|------------------------------|--------------|---------------------------------------------------------------------------------------|
| Diacylglycerol               | DAG          | 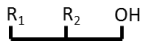   |
| Phosphatidic acid            | PA           |    |
| Phosphatidylcholine          | PC           |    |
| Phosphatidylethanolamine     | PE           |    |
| Phosphatidylserine           | PS           |    |
| Phosphatidylglycerol         | PG           |  |
| Phosphatidylinositol         | PI           |  |
| Monogalactosyldiacylglycerol | MGDG         |  |
| Digalactosyldiacylglycerol   | DGDG         |  |

R1 or R2, fatty acid. Cho, choline. EA, ethanolamine. Ser, Serine. Gro, glycerol. Ino, inositol. Gal, galactosyl. Cycled-P, PO<sup>4-</sup>.

**Table S2.** Amounts of membrane lipids in each head-group class and the total membrane lipid contents of the *A. thaliana* seeds during the hydration–dehydration cycles.

| Lipid class | Lipid/dry weight (nmol/mg DW) |                           |                           |                           |                            |
|-------------|-------------------------------|---------------------------|---------------------------|---------------------------|----------------------------|
|             | C                             | 3H                        | 3D                        | 4H                        | 6D                         |
| DGDG        | 0.76 ± 0.06 <sup>a</sup>      | 0.59 ± 0.04 <sup>b</sup>  | 0.36 ± 0.06 <sup>d</sup>  | 0.65 ± 0.03 <sup>b</sup>  | 0.44 ± 0.04 <sup>c</sup>   |
| MGDG        | 0.29 ± 0.02 <sup>a</sup>      | 0.27 ± 0.02 <sup>a</sup>  | 0.06 ± 0.02 <sup>d</sup>  | 0.23 ± 0.01 <sup>b</sup>  | 0.11 ± 0.03 <sup>c</sup>   |
| PG          | 0.17 ± 0.01 <sup>b</sup>      | 0.20 ± 0.02 <sup>a</sup>  | 0.02 ± 0.00 <sup>c</sup>  | 0.21 ± 0.01 <sup>a</sup>  | 0.00 ± 0.00 <sup>c</sup>   |
| PC          | 3.24 ± 0.24 <sup>c</sup>      | 5.71 ± 0.31 <sup>a</sup>  | 0.12 ± 0.02 <sup>d</sup>  | 5.10 ± 0.16 <sup>b</sup>  | 0.04 ± 0.01 <sup>d</sup>   |
| PE          | 1.46 ± 0.06 <sup>b</sup>      | 3.41 ± 0.24 <sup>a</sup>  | 0.12 ± 0.02 <sup>c</sup>  | 3.42 ± 0.19 <sup>a</sup>  | 0.10 ± 0.03 <sup>c</sup>   |
| PI          | 3.56 ± 0.26 <sup>b</sup>      | 3.59 ± 0.33 <sup>b</sup>  | 0.93 ± 0.12 <sup>c</sup>  | 5.22 ± 0.34 <sup>a</sup>  | 0.55 ± 0.07 <sup>d</sup>   |
| PS          | 0.08 ± 0.02 <sup>c</sup>      | 0.18 ± 0.06 <sup>b</sup>  | 0.06 ± 0.02 <sup>cd</sup> | 0.23 ± 0.03 <sup>a</sup>  | 0.04 ± 0.01 <sup>d</sup>   |
| PA*         | 1.37 ± 0.18 <sup>b</sup>      | 0.29 ± 0.04 <sup>c</sup>  | 1.77 ± 0.26 <sup>a</sup>  | 0.35 ± 0.03 <sup>c</sup>  | 1.87 ± 0.12 <sup>a</sup>   |
| TPL         | 11.23 ± 0.90 <sup>c</sup>     | 14.72 ± 0.28 <sup>b</sup> | 3.46 ± 0.48 <sup>d</sup>  | 15.52 ± 0.53 <sup>a</sup> | 3.21 ± 0.25 <sup>d</sup>   |
| DAG         | 30.39 ± 1.10 <sup>bc</sup>    | 21.28 ± 0.31 <sup>d</sup> | 32.42 ± 4.59 <sup>b</sup> | 27.69 ± 2.54 <sup>c</sup> | 36.79 ± 3.76 <sup>a</sup>  |
| TPL + DAG   | 41.62 ± 0.91 <sup>a</sup>     | 36.11 ± 1.06 <sup>b</sup> | 35.88 ± 5.06 <sup>b</sup> | 43.21 ± 2.75 <sup>a</sup> | 40.00 ± 3.93 <sup>ab</sup> |

C: control (dry seeds), 3H: hydration part of the third hydration–dehydration cycle, 3D: dehydration part of the third hydration–dehydration cycle, 4H: hydration part of the fourth hydration–dehydration cycle, 6D: dehydration part of the sixth hydration–dehydration cycle.

DW, Dry weight. TPL, Total polar lipid. Values in the same row with different letters are significantly different ( $p < 0.05$ ). Each value is means ± SD ( $n = 4$  or  $5$ ). \* The PA contents were published previously. [34]

**Table S3.** Compositions of the membrane lipids in each head-group class and the total membrane lipid contents of *A. thaliana* seeds during the hydration–dehydration cycles.

| Lipid class | Lipids (mol %)            |                           |                           |                           |                           |
|-------------|---------------------------|---------------------------|---------------------------|---------------------------|---------------------------|
|             | C                         | 3H                        | 3D                        | 4H                        | 6D                        |
| DGDG        | 6.83 ± 0.63 <sup>c</sup>  | 4.13 ± 0.22 <sup>d</sup>  | 10.39 ± 0.56 <sup>b</sup> | 4.19 ± 0.22 <sup>d</sup>  | 13.67 ± 0.70 <sup>a</sup> |
| MGDG        | 2.55 ± 0.23 <sup>b</sup>  | 1.88 ± 0.10 <sup>c</sup>  | 1.81 ± 0.21 <sup>c</sup>  | 1.47 ± 0.13 <sup>c</sup>  | 3.26 ± 0.76 <sup>a</sup>  |
| PG          | 1.52 ± 0.06 <sup>a</sup>  | 1.38 ± 0.10 <sup>b</sup>  | 0.44 ± 0.07 <sup>c</sup>  | 1.34 ± 0.02 <sup>b</sup>  | 0.11 ± 0.08 <sup>d</sup>  |
| PC          | 28.84 ± 0.75 <sup>c</sup> | 39.63 ± 0.67 <sup>a</sup> | 3.45 ± 0.87 <sup>d</sup>  | 32.90 ± 1.51 <sup>b</sup> | 1.34 ± 0.29 <sup>e</sup>  |
| PE          | 13.62 ± 0.70 <sup>c</sup> | 23.26 ± 0.38 <sup>a</sup> | 3.50 ± 0.25 <sup>d</sup>  | 21.99 ± 0.62 <sup>b</sup> | 3.00 ± 0.84 <sup>d</sup>  |
| PI          | 31.72 ± 0.70 <sup>b</sup> | 24.91 ± 1.42 <sup>d</sup> | 26.95 ± 0.43 <sup>c</sup> | 33.58 ± 1.30 <sup>a</sup> | 16.96 ± 1.50 <sup>e</sup> |
| PS          | 0.73 ± 0.15 <sup>c</sup>  | 1.26 ± 0.22 <sup>b</sup>  | 1.76 ± 0.31 <sup>a</sup>  | 1.49 ± 0.16 <sup>ab</sup> | 1.22 ± 0.19 <sup>b</sup>  |
| PA          | 12.13 ± 0.64 <sup>c</sup> | 2.05 ± 0.37 <sup>d</sup>  | 51.00 ± 0.76 <sup>b</sup> | 2.26 ± 0.15 <sup>d</sup>  | 58.35 ± 4.94 <sup>a</sup> |

The treatment was the same as that described in Table S2. Values in the same row with different letters are significantly different ( $p < 0.05$ ). Each value is means ± SD ( $n = 4$  or  $5$ ).

**Table S4.** Acyl chain lengths of the membrane lipids in the *A. thaliana* seeds during the hydration–dehydration cycles.

| Lipid<br>class    | Acyl chain length (carbon) |                            |                            |                           |                           |
|-------------------|----------------------------|----------------------------|----------------------------|---------------------------|---------------------------|
|                   | C                          | 3H                         | 3D                         | 4H                        | 6D                        |
| DGDG              | 35.39 ± 0.05 <sup>b</sup>  | 35.43 ± 0.03 <sup>ab</sup> | 35.44 ± 0.04 <sup>ab</sup> | 35.46 ± 0.03 <sup>a</sup> | 35.48 ± 0.05 <sup>a</sup> |
| MGDG              | 34.56 ± 0.05 <sup>c</sup>  | 35.35 ± 0.04 <sup>b</sup>  | 35.42 ± 0.22 <sup>b</sup>  | 35.49 ± 0.07 <sup>b</sup> | 35.58 ± 0.06 <sup>a</sup> |
| PG                | 33.97 ± 0.06               | 34.02 ± 0.06               | 34.25 ± 0.20               | 34.13 ± 0.08              | 34.00 ± 1.21              |
| PC                | 35.73 ± 0.03 <sup>b</sup>  | 35.74 ± 0.04 <sup>b</sup>  | 35.99 ± 0.11 <sup>a</sup>  | 35.79 ± 0.02 <sup>b</sup> | 35.97 ± 0.09 <sup>a</sup> |
| PE                | 35.65 ± 0.01 <sup>b</sup>  | 35.63 ± 0.02 <sup>b</sup>  | 35.93 ± 0.11 <sup>a</sup>  | 35.72 ± 0.02 <sup>b</sup> | 35.94 ± 0.14 <sup>a</sup> |
| PI                | 34.68 ± 0.02 <sup>d</sup>  | 34.71 ± 0.00 <sup>cd</sup> | 34.93 ± 0.03 <sup>b</sup>  | 34.73 ± 0.01 <sup>c</sup> | 35.00 ± 0.02 <sup>a</sup> |
| PS                | 40.94 ± 0.37 <sup>c</sup>  | 39.63 ± 0.18 <sup>d</sup>  | 41.97 ± 0.29 <sup>b</sup>  | 39.72 ± 0.17 <sup>d</sup> | 42.61 ± 0.41 <sup>a</sup> |
| PA                | 35.41 ± 0.02 <sup>b</sup>  | 35.46 ± 0.03 <sup>a</sup>  | 35.51 ± 0.02 <sup>a</sup>  | 35.50 ± 0.06 <sup>a</sup> | 35.49 ± 0.03 <sup>a</sup> |
| Total polar lipid | 34.93 ± 0.03 <sup>d</sup>  | 35.26 ± 0.03 <sup>c</sup>  | 35.35 ± 0.05 <sup>b</sup>  | 35.29 ± 0.03 <sup>c</sup> | 35.42 ± 0.03 <sup>a</sup> |
| DAG               | 35.51 ± 0.00 <sup>b</sup>  | 35.56 ± 0.03 <sup>a</sup>  | 35.44 ± 0.02 <sup>c</sup>  | 35.59 ± 0.01 <sup>a</sup> | 35.30 ± 0.04 <sup>d</sup> |

The treatment was the same as that described in Table S2. Each value is mean ± SD ( $n = 4$  or  $5$ ). Values in the same row with different letters are significantly different ( $p < 0.05$ ).

**Table S5.** Lyso-phospholipid contents of the *A. thaliana* seeds during the hydration–dehydration cycles.

| Lipid<br>class | Lipid/dry weight (nmol/mg DW) |                            |                             |                            |                            |
|----------------|-------------------------------|----------------------------|-----------------------------|----------------------------|----------------------------|
|                | C                             | 3H                         | 3D                          | 4H                         | 6D                         |
| LysoPG         | 0.021 ± 0.003 <sup>a</sup>    | 0.013 ± 0.005 <sup>b</sup> | 0.010 ± 0.005 <sup>bc</sup> | 0.007 ± 0.002 <sup>c</sup> | 0.006 ± 0.004 <sup>c</sup> |
| LysoPC         | 0.163 ± 0.020 <sup>a</sup>    | 0.099 ± 0.014 <sup>b</sup> | 0.009 ± 0.004 <sup>d</sup>  | 0.071 ± 0.004 <sup>c</sup> | 0.005 ± 0.003 <sup>d</sup> |
| LysoPE         | 0.046 ± 0.002 <sup>a</sup>    | 0.042 ± 0.005 <sup>a</sup> | 0.005 ± 0.001 <sup>b</sup>  | 0.043 ± 0.005 <sup>a</sup> | 0.006 ± 0.002 <sup>b</sup> |

The treatment was the same as that described in Table S2. Each value is mean ± SD ( $n = 4$  or  $5$ ). Values in the same row with different letters are significantly different ( $p < 0.05$ ).

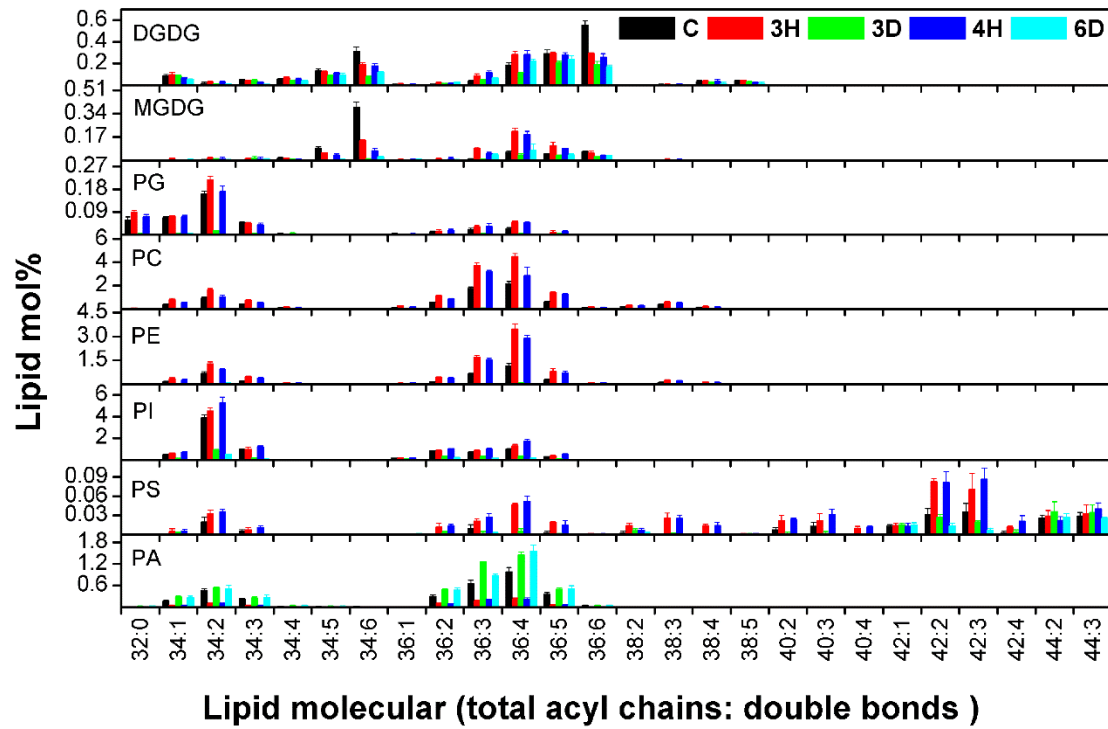

**Figure S1.** Compositions of the lipid molecular species in *A. thaliana* seeds during the hydration–dehydration cycles. The treatment was the same as that described in Table S2. Each value is mean  $\pm$  SD ( $n = 4$  or  $5$ ).

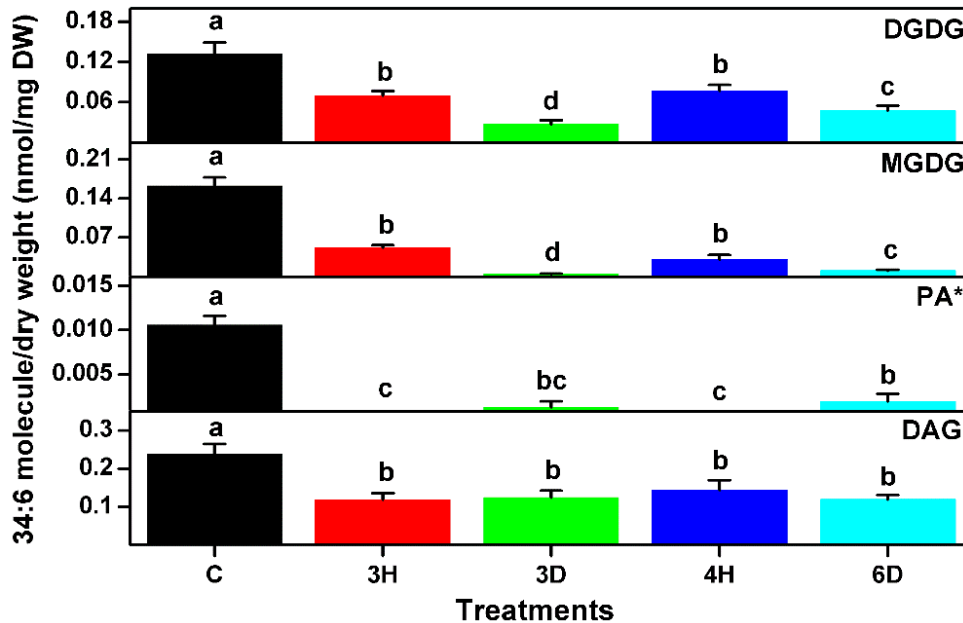

**Figure S2.** Effects 34:6 molecular species contents of the *A. thaliana* seeds during the hydration–dehydration cycles. The treatment was the same as that described in Table S2. DW, dry weight. Each value is mean  $\pm$  SD ( $n = 4$  or  $5$ ). Bars for the same lipid class with different letters indicate that the values were significantly different ( $p < 0.05$ ). \* The PA 34:6 molecular species contents were published previously. [34]
